# Supplementary material for: Last interglacial sea-level proxies in East Africa and the Western Indian Ocean
Source: Copernicus journal article supplement (doi:10.5194/essd-13-1633-2021), 2021-04-20
Supplement: Supplementary file 1 [file essd-13-1633-2021-supplement.zip]

Archive with 2 entries (2 files):
- EAWIO_map.html
- essd-13-1633-2021-supplement-title-page.pdf
