# Supplementary material for: Last interglacial sea-level proxies in East Africa and the Western Indian Ocean
Source: Copernicus journal article supplement (doi:10.5194/essd-13-1633-2021), 2021-04-20
Supplement: Supplementary file 1 [file essd-13-1633-2021-supplement.zip › EAWIO_map.html]

**RSL datapoints**  
  Stratigraphy index points  
  Coral index points  
  Speleothem index points  
  Terrestrial limiting  
  Marine limiting  
 **Dated samples**  
  Not accepted  
  Amino Acid Racemization  
  Electron Spin Resonance  
  Luminescence  
  U-Series
