# Supplementary material for: Last interglacial sea-level proxies in East Africa and the Western Indian Ocean
Source: Copernicus journal article supplement (doi:10.5194/essd-13-1633-2021), 2021-04-20
Supplement: Supplementary file 1 [file essd-13-1633-2021-supplement.zip › essd-13-1633-2021-supplement-title-page.pdf]

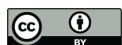

*Supplement of*

## **Last interglacial sea-level proxies in East Africa and the Western Indian Ocean**

**Patrick Boyden et al.**

*Correspondence to:* Patrick Boyden ([pboyden@marum.de](mailto:pboyden@marum.de))

- [essd-13-1633-2021-supplement-title-page.pdf](#)
- [EAWIO\\_map.html](#)

The copyright of individual parts of the supplement might differ from the article licence.
